# Supplementary material for: Biomolecule incorporated poly-ε-caprolactone nanofibrous scaffolds for enhanced human meniscal cell attachment and proliferation
Source: Royal Society of Chemistry journal article supplement (doi:10.1039/c5ra14315b), 2015-01-01
Supplement: c5ra14315b1.pdf [file c5ra14315b1.pdf]

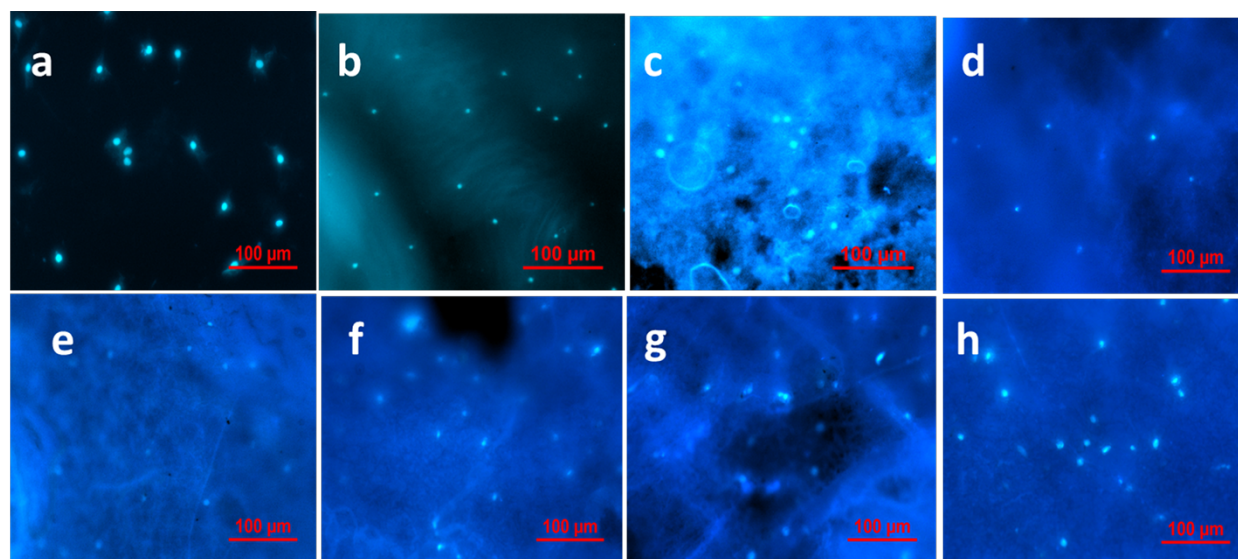

**Supplementary figure 1.** Fluorescence microscopic images of Hoechst stained meniscal cells on nanofibrous scaffolds (6<sup>th</sup> day): (a) C, (b) P-C, (c) P+B, (d) PB-1, (e) PB-0.5, (f) P+G, (g) PG-1 and (h) PG-0.5.

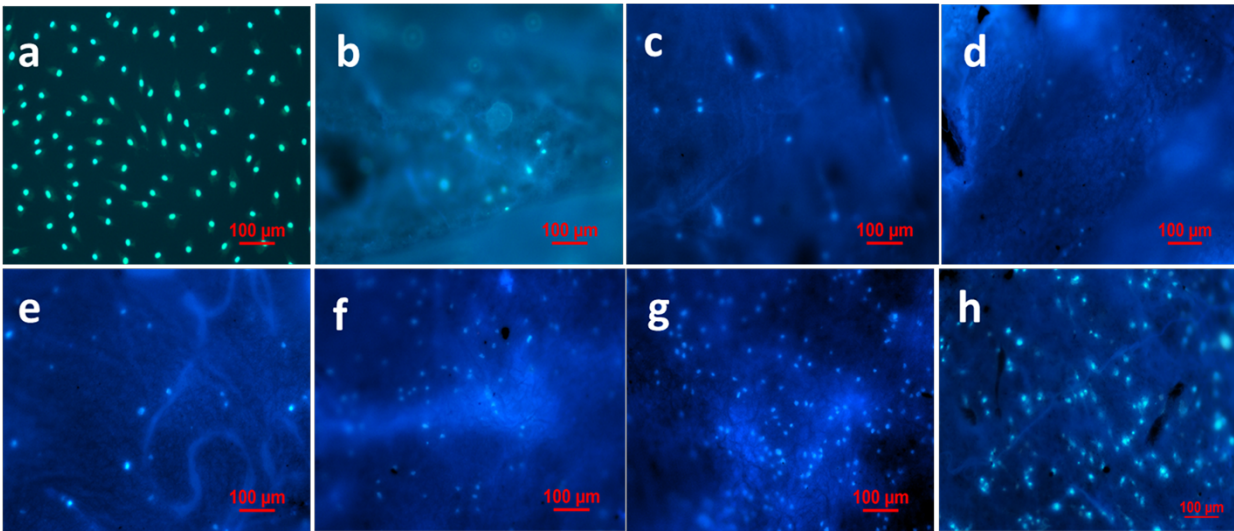

**Supplementary figure 2.** Fluorescence microscopic images of Hoechst stained meniscal cells on nanofibrous scaffolds (12<sup>th</sup> day): (a) C, (b) P-C, (c) P+B, (d) PB-1, (e) PB-0.5, (f) P+G, (g) PG-1 and (h) PG-0.5.
